# Supplementary material for: Spontaneous chiral resolution and hierarchical directing effects of two-winged propeller-like SDAs on the construction of noncentrosymmetric iodoargentates/iodocuprates
Source: Royal Society of Chemistry journal article supplement (doi:10.1039/c6ra15159k), 2016-01-01
Supplement: c6ra15159k1.pdf [file c6ra15159k1.pdf]

# Spontaneous Chiral Resolution and Hierarchically Directing Effects of Two-winged Propeller-like SDAs on the Construction of Noncentrosymmetric Iodoargentates/Iodocuprates

Pengfei Hao, Yanrong Qiao, Tanlai Yu, Junju Shen, Dongting Dai and Yunlong Fu\*

School of Chemistry & Material Science, Shanxi Normal University, Linfen 041004, P. R. China

## Supporting Information (SI)

Supporting Information of four compounds: Asymmetric unit diagram (Fig. S1), EPR spectrum (Fig. S2), TG analyses (Fig. S3), Solid state optical diffuse-reflection spectra (Fig. S4), X-ray powder diffraction (XRPD) patterns (Fig. S5), Infrared Spectroscopy (Fig. S6), and selected bond lengths (Å) and angles (°) for 1–4 (Tables S1).

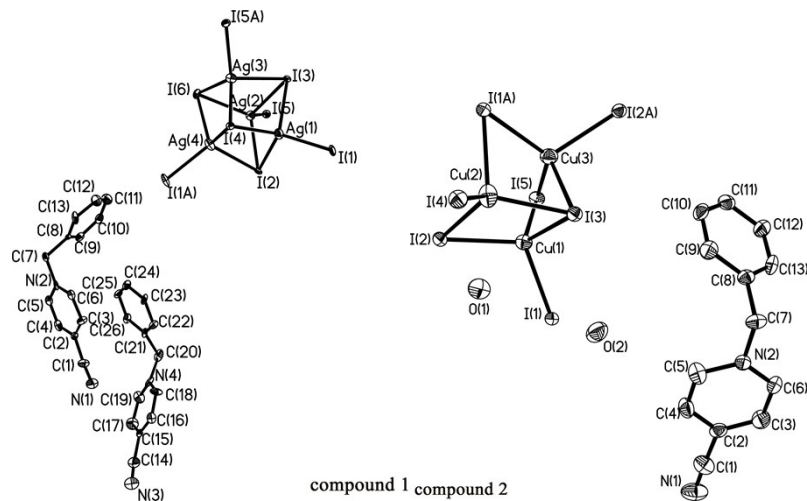

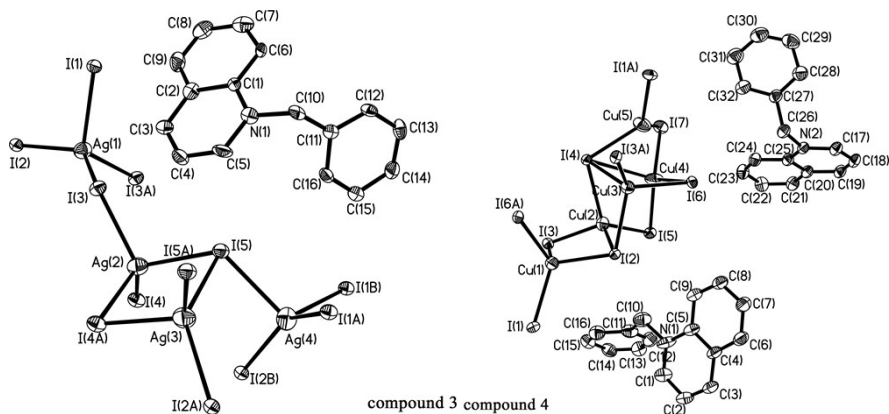

Fig. S1 Asymmetric unit diagram of 1–4 (H atoms are omitted for clarity).

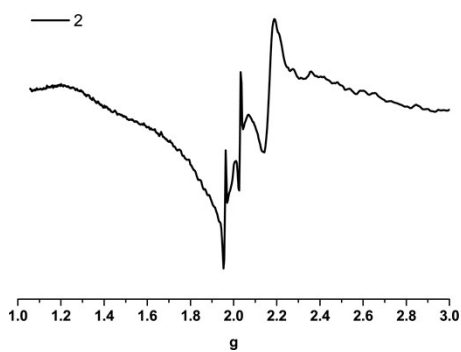

Fig. S2 EPR spectrum of 2 upon irradiation in the solid state.

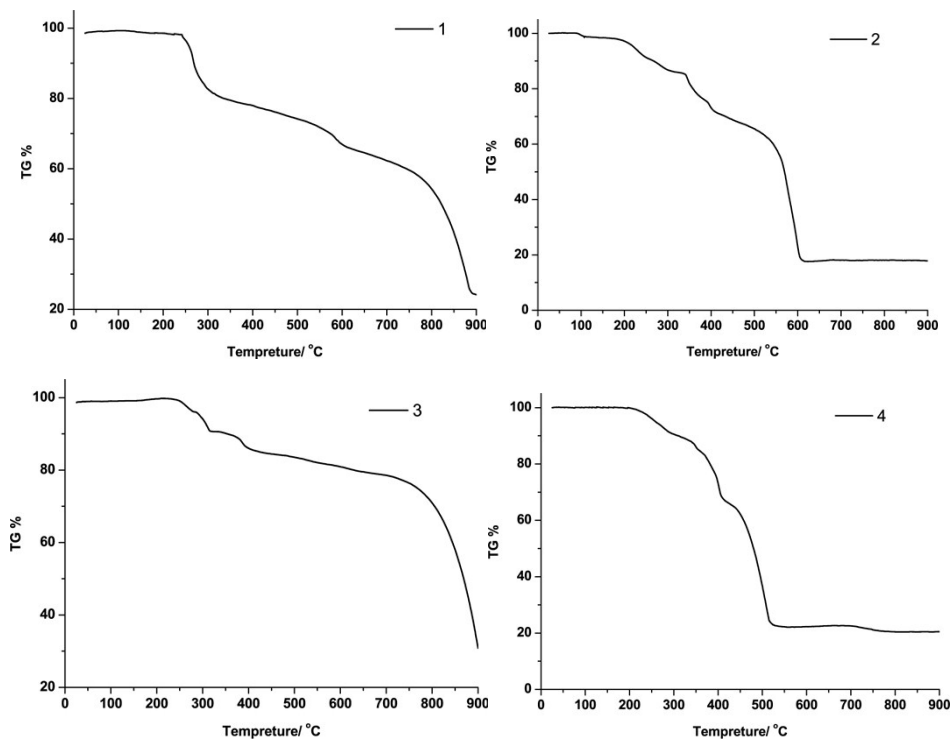

Fig. S3 TG curves for compounds 1–4.

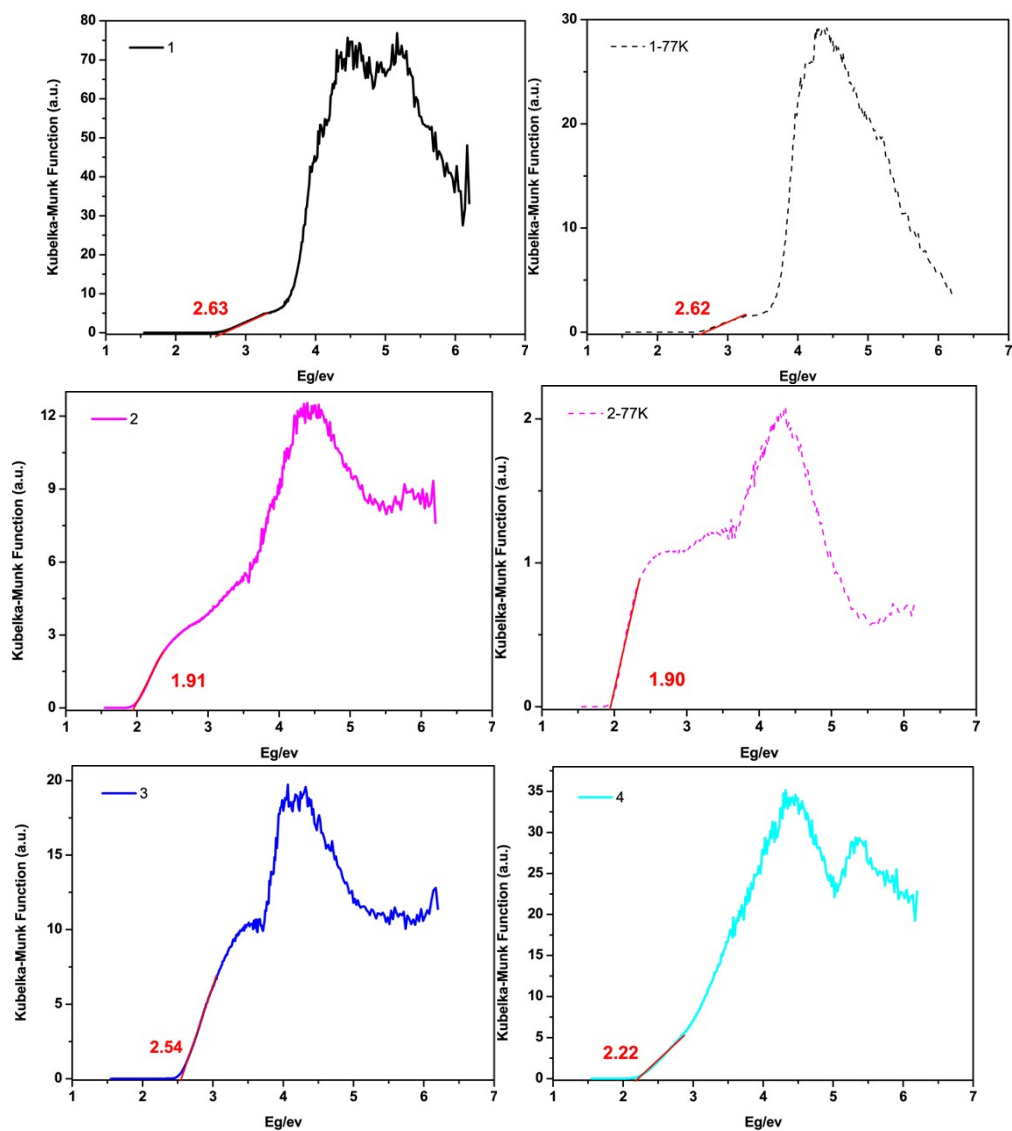

Fig. S4 Solid state optical diffuse-reflection spectra of 1-4 at room temperature and 1-2 at 77K.

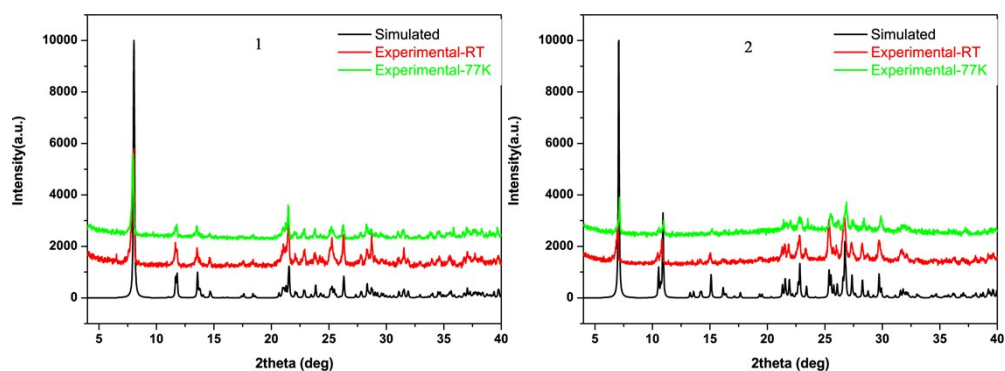

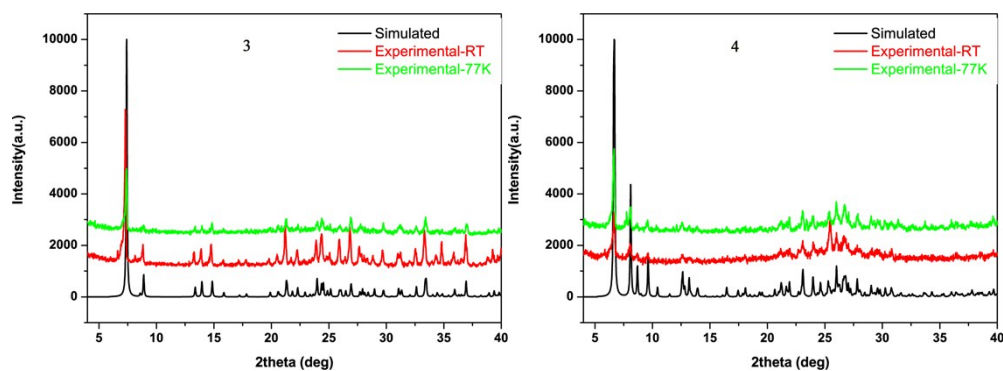

**Fig. S5** X-ray powder diffraction (XRPD) patterns of **1–4** at room temperature (RT) and 77K.

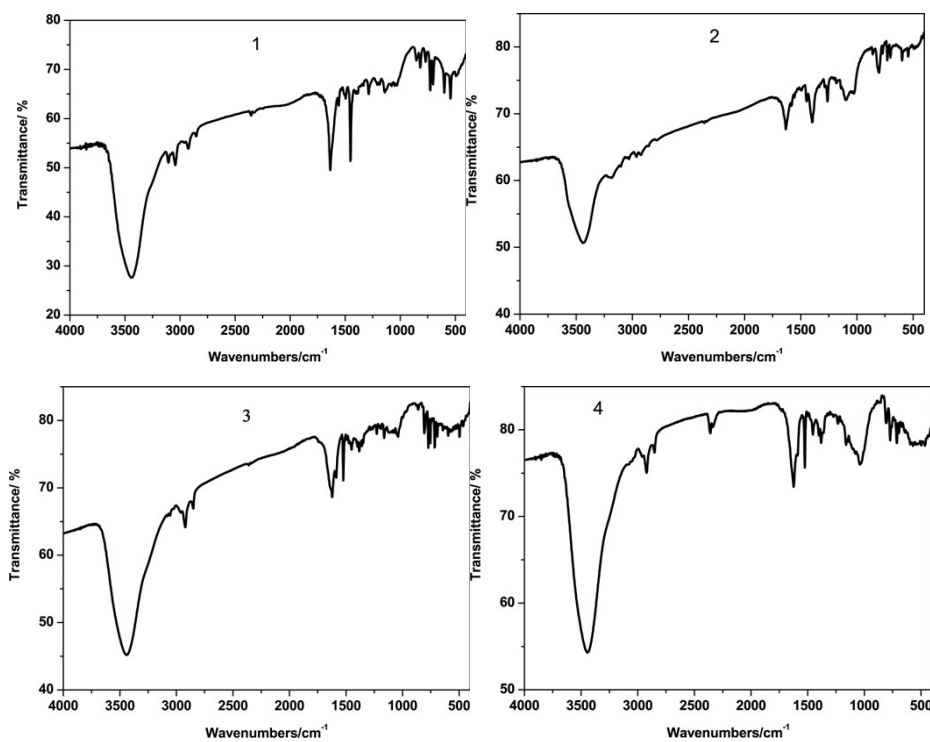

**Fig. S6** IR spectra of **1–4**

**Table S1.** Selected bond lengths (Å) and angles (°) for **1–4** at 293(2) K

| Compound 1          |            |              |            |
|---------------------|------------|--------------|------------|
| Ag–I bond distances |            |              |            |
| Ag(1)–I(1)          | 2.7913(9)  | Ag(2)–I(5)   | 2.8326(9)  |
| Ag(1)–I(2)          | 2.8845(12) | Ag(2)–I(2)   | 2.8576(10) |
| Ag(1)–I(4)          | 2.9041(7)  | Ag(2)–I(6)   | 2.8806(7)  |
| Ag(1)–I(3)          | 2.9153(10) | Ag(2)–I(3)   | 2.9325(10) |
| Ag(3)–I(5)#1        | 2.7967(12) | Ag(4)–I(1)#2 | 2.7551(10) |
| Ag(3)–I(6)          | 2.8525(10) | Ag(4)–I(4)   | 2.8548(12) |
| Ag(3)–I(4)          | 2.8949(10) | Ag(4)–I(6)   | 2.9566(12) |
| Ag(3)–I(3)          | 2.9082(6)  | Ag(4)–I(2)   | 2.9654(10) |
| Ag...Ag distances   |            |              |            |
| Ag(1)–Ag(2)         | 3.2574(11) | Ag(2)–Ag(4)  | 3.1828(10) |
| Ag(1)–Ag(3)         | 3.4380(12) | Ag(3)–Ag(4)  | 3.3398(14) |

## Selected angles

|                   |           |                   |           |
|-------------------|-----------|-------------------|-----------|
| I(1)–Ag(1)–I(2)   | 113.58(4) | I(5)–Ag(2)–I(2)   | 105.38(3) |
| I(1)–Ag(1)–I(4)   | 117.60(3) | I(5)–Ag(2)–I(6)   | 116.34(3) |
| I(2)–Ag(1)–I(4)   | 104.83(2) | I(2)–Ag(2)–I(6)   | 114.20(2) |
| I(1)–Ag(1)–I(3)   | 106.95(3) | I(5)–Ag(2)–I(3)   | 109.44(2) |
| I(2)–Ag(1)–I(3)   | 108.49(3) | I(2)–Ag(2)–I(3)   | 108.75(3) |
| I(4)–Ag(1)–I(3)   | 104.80(3) | I(6)–Ag(2)–I(3)   | 102.55(3) |
| I(5)#1–Ag(3)–I(6) | 121.62(3) | I(1)#2–Ag(4)–I(4) | 122.69(3) |
| I(5)#1–Ag(3)–I(4) | 111.30(3) | I(1)#2–Ag(4)–I(6) | 106.97(3) |
| I(6)–Ag(3)–I(4)   | 108.01(3) | I(4)–Ag(4)–I(6)   | 106.28(4) |
| I(5)#1–Ag(3)–I(3) | 105.37(3) | I(1)#2–Ag(4)–I(2) | 107.47(4) |
| I(6)–Ag(3)–I(3)   | 103.86(3) | I(4)–Ag(4)–I(2)   | 104.01(3) |
| I(4)–Ag(3)–I(3)   | 105.22(3) | I(6)–Ag(4)–I(2)   | 108.89(3) |

Symmetry code: #1  $x, -y+2, z-1/2$ ; #2  $x-1/2, -y+5/2, z-1/2$ ; #3  $x+1/2, -y+5/2, z+1/2$ ; #4  $x, -y+2, z+1/2$

## Compound 2

## Cu–I bond distances

|              |            |              |            |
|--------------|------------|--------------|------------|
| Cu(1)–I(5)   | 2.6470(16) | Cu(2)–I(4)   | 2.5842(17) |
| Cu(1)–I(2)   | 2.6763(17) | Cu(2)–I(2)   | 2.6662(18) |
| Cu(1)–I(3)   | 2.6840(15) | Cu(2)–I(3)   | 2.6838(19) |
| Cu(1)–I(1)   | 2.6912(17) | Cu(2)–I(1)#2 | 2.822(2)   |
| Cu(3)–I(5)   | 2.6137(15) | Cu(3)–I(2)#2 | 2.6996(18) |
| Cu(3)–I(1)#2 | 2.6778(17) | Cu(3)–I(3)   | 2.7657(18) |

## Cu...Cu distances

|               |          |             |          |
|---------------|----------|-------------|----------|
| Cu(1)–Cu(2)   | 2.715(2) | Cu(1)–Cu(3) | 2.856(2) |
| Cu(1)–Cu(3)#1 | 2.815(2) | Cu(2)–Cu(3) | 3.014(2) |
| Cu(3)–Cu(1)#2 | 2.815(2) |             |          |

## Selected angles

|                     |           |                   |           |
|---------------------|-----------|-------------------|-----------|
| I(5)–Cu(1)–I(2)     | 104.49(5) | I(4)–Cu(2)–I(2)   | 113.34(7) |
| I(5)–Cu(1)–I(3)     | 109.36(6) | I(4)–Cu(2)–I(3)   | 107.14(6) |
| I(2)–Cu(1)–I(3)     | 117.57(5) | I(2)–Cu(2)–I(3)   | 117.93(6) |
| I(5)–Cu(1)–I(1)     | 108.00(5) | I(4)–Cu(2)–I(1)#2 | 110.04(7) |
| I(2)–Cu(1)–I(1)     | 113.01(6) | I(2)–Cu(2)–I(1)#2 | 103.80(6) |
| I(3)–Cu(1)–I(1)     | 104.15(5) | I(3)–Cu(2)–I(1)#2 | 104.00(7) |
| I(5)–Cu(3)–I(1)#2   | 118.91(6) | I(5)–Cu(3)–I(3)   | 107.89(6) |
| I(5)–Cu(3)–I(2)#2   | 108.91(6) | I(1)#2–Cu(3)–I(3) | 105.71(5) |
| I(1)#2–Cu(3)–I(2)#2 | 112.69(6) | I(2)#2–Cu(3)–I(3) | 101.04(5) |

Symmetry code: #1  $-x+1, y-1/2, -z+1$ ; #2  $-x+1, y+1/2, -z+1$

---

Compound 3

---

Ag–I bond distances

|              |            |              |            |
|--------------|------------|--------------|------------|
| Ag(1)–I(3)   | 2.7732(8)  | Ag(2)–I(4)   | 2.7961(8)  |
| Ag(1)–I(2)   | 2.8486(9)  | Ag(2)–I(4)#3 | 2.8236(8)  |
| Ag(1)–I(3)#1 | 2.8584(8)  | Ag(2)–I(3)   | 2.8323(9)  |
| Ag(1)–I(1)   | 2.9126(8)  | Ag(2)–I(5)   | 2.9302(10) |
| Ag(3)–I(2)#4 | 2.8158(9)  | Ag(4)–I(1)#4 | 2.7962(8)  |
| Ag(3)–I(5)   | 2.8385(9)  | Ag(4)–I(2)#5 | 2.9043(10) |
| Ag(3)–I(4)#3 | 2.8644(11) | Ag(4)–I(1)#5 | 2.9306(8)  |
| Ag(3)–I(5)#3 | 3.1036(9)  | Ag(4)–I(5)   | 2.9623(9)  |

Ag...Ag distances

|               |            |               |            |
|---------------|------------|---------------|------------|
| Ag(1)–Ag(4)#2 | 3.1614(9)  | Ag(3)–Ag(2)#3 | 3.1522(11) |
| Ag(2)–Ag(3)#1 | 3.1522(11) | Ag(4)–Ag(1)#5 | 3.1614(9)  |

Selected angles

|                     |           |                     |           |
|---------------------|-----------|---------------------|-----------|
| I(3)–Ag(1)–I(2)     | 132.52(3) | I(4)–Ag(2)–I(4)#3   | 108.88(3) |
| I(3)–Ag(1)–I(3)#1   | 108.53(3) | I(4)–Ag(2)–I(3)     | 109.19(3) |
| I(2)–Ag(1)–I(3)#1   | 100.36(3) | I(4)#3–Ag(2)–I(3)   | 112.00(3) |
| I(3)–Ag(1)–I(1)     | 102.20(3) | I(4)–Ag(2)–I(5)     | 118.36(3) |
| I(2)–Ag(1)–I(1)     | 99.89(2)  | I(4)#3–Ag(2)–I(5)   | 102.71(3) |
| I(3)#1–Ag(1)–I(1)   | 113.12(3) | I(3)–Ag(2)–I(5)     | 105.61(3) |
| I(2)#4–Ag(3)–I(5)   | 135.00(3) | I(1)#4–Ag(4)–I(2)#5 | 144.47(3) |
| I(2)#4–Ag(3)–I(4)#3 | 107.31(3) | I(1)#4–Ag(4)–I(1)#5 | 105.91(3) |
| I(5)–Ag(3)–I(4)#3   | 104.01(3) | I(2)#5–Ag(4)–I(1)#5 | 98.18(2)  |
| I(2)#4–Ag(3)–I(5)#3 | 97.59(3)  | I(1)#4–Ag(4)–I(5)   | 98.46(2)  |
| I(5)–Ag(3)–I(5)#3   | 100.50(3) | I(2)#5–Ag(4)–I(5)   | 98.89(3)  |
| I(4)#3–Ag(3)–I(5)#3 | 110.93(3) | I(1)#5–Ag(4)–I(5)   | 107.17(3) |

Symmetry code: #1  $x, y+1, z$ ; #2  $x-1/2, -y+2, z-1/2$ ; #3  $x, y-1, z$ ; #4  $x+1/2, -y+1, z+1/2$ ; #5  $x+1/2, -y+2, z+1/2$ ; #6  $x-1/2, -y+1, z-1/2$

---



---

Compound 4

---

Cu–I bond distances

|              |            |            |            |
|--------------|------------|------------|------------|
| Cu(1)–I(1)   | 2.6126(9)  | Cu(2)–I(5) | 2.6336(10) |
| Cu(1)–I(2)   | 2.6566(8)  | Cu(2)–I(3) | 2.6686(9)  |
| Cu(1)–I(6)#1 | 2.7079(10) | Cu(2)–I(2) | 2.6927(10) |
| Cu(1)–I(3)   | 2.7131(10) | Cu(2)–I(4) | 2.7393(10) |
| Cu(3)–I(2)   | 2.6574(9)  | Cu(4)–I(5) | 2.5272(9)  |
| Cu(3)–I(3)#2 | 2.6644(10) | Cu(4)–I(7) | 2.5942(10) |
| Cu(3)–I(6)   | 2.6797(9)  | Cu(4)–I(6) | 2.6320(10) |
| Cu(3)–I(4)   | 2.6837(9)  | Cu(4)–I(4) | 3.0797(12) |
| Cu(5)–I(1)#2 | 2.5071(10) | Cu(5)–I(4) | 2.6593(10) |
| Cu(5)–I(7)   | 2.6118(12) |            |            |

Cu...Cu distances

|                   |            |                 |            |
|-------------------|------------|-----------------|------------|
| Cu(1)–Cu(3)#1     | 2.8210(11) | Cu(2)–Cu(3)     | 2.9396(12) |
| Cu(1)–Cu(5)#1     | 2.9109(14) | Cu(3)–Cu(1)#2   | 2.8210(11) |
| Cu(1)–Cu(2)       | 2.9388(13) | Cu(4)–Cu(5)     | 2.5498(13) |
| Cu(2)–Cu(4)       | 2.8816(13) | Cu(5)–Cu(1)#2   | 2.9109(14) |
| Selected angles   |            |                 |            |
| I(1)–Cu(1)–I(2)   | 111.66(3)  | I(5)–Cu(2)–I(3) | 110.13(3)  |
| I(1)–Cu(1)–I(6)#1 | 118.27(4)  | I(5)–Cu(2)–I(2) | 110.80(3)  |
| I(2)–Cu(1)–I(6)#1 | 97.18(3)   | I(3)–Cu(2)–I(2) | 112.47(3)  |
| I(1)–Cu(1)–I(3)   | 107.55(3)  | I(5)–Cu(2)–I(4) | 117.07(4)  |
| I(2)–Cu(1)–I(3)   | 112.20(3)  | I(3)–Cu(2)–I(4) | 100.39(3)  |
| I(6)#1–Cu(1)–I(3) | 109.82(3)  | I(2)–Cu(2)–I(4) | 105.62(3)  |
| I(2)–Cu(3)–I(3)#2 | 110.48(4)  | I(5)–Cu(4)–I(7) | 125.43(4)  |
| I(2)–Cu(3)–I(6)   | 105.26(3)  | I(5)–Cu(4)–I(6) | 109.19(3)  |
| I(3)#2–Cu(3)–I(6) | 112.20(3)  | I(7)–Cu(4)–I(6) | 112.97(3)  |
| I(2)–Cu(3)–I(4)   | 108.23(3)  | I(5)–Cu(4)–I(4) | 109.25(4)  |
| I(3)#2–Cu(3)–I(4) | 108.85(3)  | I(7)–Cu(4)–I(4) | 94.52(3)   |
| I(6)–Cu(3)–I(4)   | 111.72(4)  | I(6)–Cu(4)–I(4) | 101.72(4)  |
| I(1)#2–Cu(5)–I(7) | 125.93(4)  | I(7)–Cu(5)–I(4) | 104.94(3)  |
| I(1)#2–Cu(5)–I(4) | 120.15(4)  |                 |            |

Symmetry code: #1  $-x+1/2, y+1/2, -z+1/2$  #2  $-x+1/2, y-1/2, -z+1/2$

---
